# Supplementary material for: Leptospira spp. Prevalence in Cats from Southern Italy with Evaluation of Risk Factors for Exposure and Clinical Findings in Infected Cats
Source: MDPI journal article supplement (doi:10.3390/pathogens11101129), 2022-09-30
Supplement: s1 [file s1]

**Table S1.** Data from complete blood count, and biochemical profile of enrolled cats (n (%)) and cats positive for *Leptospira* spp. according to antibody positivity (Ab<sup>+</sup>) and PCR positivity from urine (uDNA<sup>+</sup>) and blood (bDNA<sup>+</sup>).

| Variable                           | All Cats      | Ab <sup>+</sup> | uDNA <sup>+</sup> | bDNA <sup>+</sup> |
|------------------------------------|---------------|-----------------|-------------------|-------------------|
| Anemia (Hb < 8.82 g/dL)            | 15/112 (13.4) | 5/17 (29.4)     | 3/10 (30.0)       | 0/4               |
| Neutrophilia (>11.32 K/ $\mu$ L)   | 15/105 (14.3) | 3/17 (17.6)     | 3/8 (37.5)        | 2/4 (50.0)        |
| Neutropenia (<2.07 K/ $\mu$ L)     | 5/105 (4.8)   | 0/17            | 0/8               | 0/4               |
| Lymphocytosis (>7.57 K/ $\mu$ L)   | 2/105 (1.9)   | 1/17 (5.9)      | 0/8               | 0/4               |
| Lymphopenia (<0.83 K/ $\mu$ L)     | 2/105 (1.9)   | 0/17            | 0/8               | 0/4               |
| Monocytosis (>0.74 K/ $\mu$ L)     | 14/105 (13.3) | 6/17 (35.3)     | 3/8 (37.5)        | 1/4 (25.0)        |
| Eosinophilia (>1.73 K/ $\mu$ L)    | 3/105 (2.9)   | 1/17 (5.9)      | 0/8               | 0/4               |
| Eosinopenia (<0.15 K/ $\mu$ L)     | 8/105 (7.6)   | 3/17 (17.6)     | 1/8 (12.5)        | 0/4               |
| Basophilia (>0.29 K/ $\mu$ L)      | 1/102 (1.0)   | 0/17            | 0/8               | 0/4               |
| Thrombocytosis (>660 K/ $\mu$ L)   | 2/103 (1.9)   | 0/17            | 0/8               | 0/4               |
| Thrombocytopenia (<136 K/ $\mu$ L) | 19/103 (18.4) | 2/17 (11.8)     | 2/8 (25.0)        | 1/4 (25.0)        |
| Increased SDMA (>14 $\mu$ g/dL)    | 26/111 (23.4) | 3/17 (17.6)     | 3/10 (30.0)       | 2/4 (50.0)        |
| Increased sCr (>2.4 mg/dL)         | 6/112 (5.4)   | 1/17 (5.9)      | 1/10 (10.0)       | 0/4               |
| Increased BUN (>36 mg/dL)          | 11/108 (10.2) | 1/16 (6.3)      | 1/10 (10.0)       | 0/4               |
| Decreased BUN (<16 mg/dL)          | 4/108 (3.7)   | 1/16 (6.3)      | 0/10              | 0/4               |

Hb = hemoglobin;  $\gamma$  = proteinuria was defined when UPC was  $\geq 0.2$ ; Hb = hemoglobin; SDMA = symmetric dimethylarginine; sCr = serum creatinine; BUN = blood urea nitrogen; PHOS = phosphorus; USG = urine specific gravity; UPC = urine protein to creatinine ratio; SAA = serum amyloid A; TP = total proteins; ALB = albumin; GLOB = globulins;

ALT = alanine aminotransferase; ALP = alkaline phosphatase; AST = aspartate aminotransferase; GGT = gamma glutamyl transferase; LAI = leukocyte alterations suggestive of inflammation including the presence of neutrophil left shift, toxic neutrophils or reactive lymphocytes; ~markers of inflammation = one or several of the following abnormalities: LAI, increased SAA, increased GLOB, decreased ALB.
